# Supplementary material for: GdF3hollow spheres: self-assembly and multiple emission spanning the UV to NIR regions under 980 nm excitation
Source: Royal Society of Chemistry journal article supplement (doi:10.1039/d0qi00084a), 2020-01-01
Supplement: d0qi00084a1.pdf [file d0qi00084a1.pdf]

## Supplementary Information

### GdF<sub>3</sub> Hollow Spheres: Self-Assembly and Multiple Emission Spanning the UV to NIR Regions under 980 nm Excitation

Xiaoyun Yuan,<sup>a</sup> Lantian Zhang,<sup>a</sup> Baojun Chen,<sup>a</sup> Jinjiao Zhu,<sup>a</sup> Xuechun Pan,<sup>a</sup> Zhenlan Fang,<sup>a,b</sup> Qiang Ju,<sup>a,b,\*</sup> Wei Huang<sup>a,c,\*</sup>

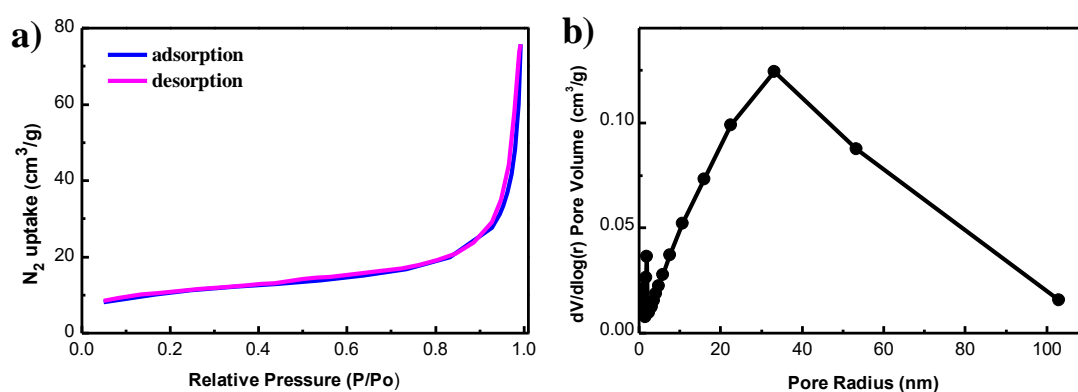

**Figure S1.** a) The N<sub>2</sub> adsorption and desorption isotherms (77 K) and b) pore size distribution of GdF<sub>3</sub> submicrometer hollow structure.

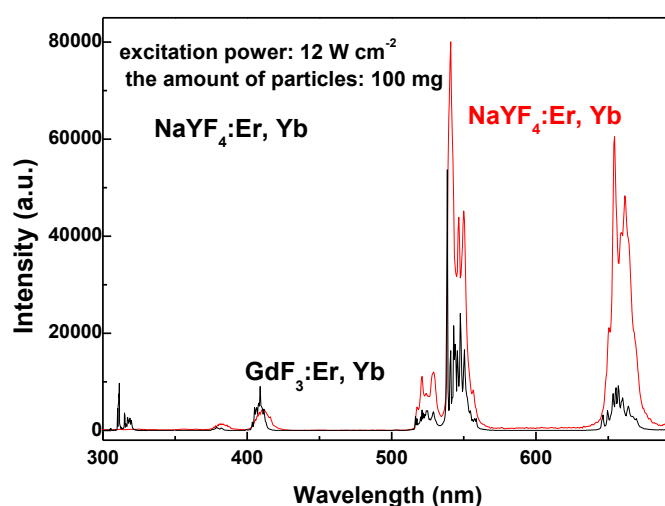

**Figure S2.** The emission spectra of GdF<sub>3</sub> hollow submicrometer spheres (black) and NaYF<sub>4</sub>: 2 at. %Er, 20 at. %Yb nanocrystals (red) under the same measure condition.

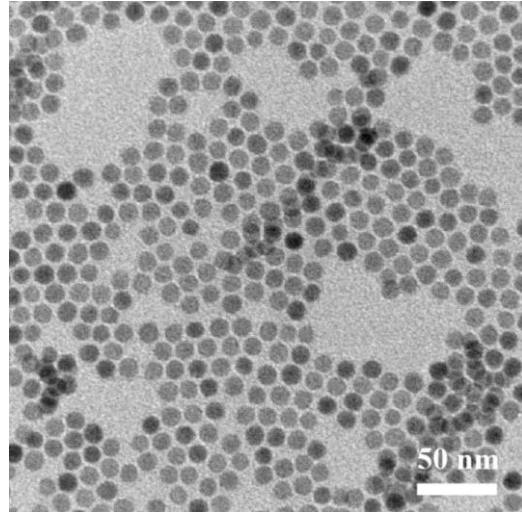

**Figure S3.** TEM image of NaYF<sub>4</sub>: 2 at. %Er, 20 at. % Yb nanocrystals.
